# Supplementary material
Source: publisher site journal article supplement (http://www.spandidos-publications.com/6210/downloadSupplementary)
Supplement: Supplementary file 1 [file downloadSupplementary]

## Sheet: Sheet1
Table SI. Ferroptosis-related genes were obtained from the FerrDb database.
No.	Gene
1	ABCC1
2	ABCC5
3	ABHD12
4	ACADSB
5	ACO1
6	ACOT1
7	ACSF2
8	ACSL1
9	ACSL3
10	ACSL4
11	ACVR1B
12	ADAM23
13	ADAMTS13
14	ADIPOQ
15	AEBP2
16	AGPAT3
17	AGPS
18	AHCY
19	AIFM2
20	AKR1C1
21	AKR1C2
22	AKR1C3
23	AKT1S1
24	ALDH3A2
25	ALOX12
26	ALOX12B
27	ALOX15
28	ALOX15B
29	ALOX5
30	ALOXE3
31	AMN
32	ANO6
33	AQP3
34	AQP5
35	AQP8
36	AR
37	ARF6
38	ARHGEF26-AS1
39	ARNTL
40	ASAH2
41	ASMTL-AS1
42	ATF2
43	ATF3
44	ATF4
45	ATG13
46	ATG16L1
47	ATG3
48	ATG4D
49	ATG5
50	ATG7
51	ATM
52	ATP5MC3
53	BACH1
54	BAP1
55	BCAT2
56	BECN1
57	BEX1
58	BID
59	BRD2
60	BRD3
61	BRD4
62	BRD7
63	BRDT
64	BRPF1
65	CA9
66	CAMKK2
67	CARS1
68	CAV1
69	CBS
70	CCDC6
71	CD44
72	CD82
73	CDC25A
74	CDCA3
75	CDH1
76	CDKN1A
77	CDKN2A
78	CDO1
79	CFL1
80	CGAS
81	CHAC1
82	CHMP1A
83	CHMP5
84	CHMP6
85	CHP1
86	CIRBP
87	circ_0007142
88	circ_0067934
89	circ0097009
90	circDTL
91	circEPSTI1
92	CircFNDC3B
93	circGFRA1
94	CircIL4R
95	CircKDM4C
96	circKIF4A
97	circPSEN1
98	CircPVT1
99	circRHBG
100	circRHOT1
101	circRNA1615
102	circ-TTBK2
103	CISD1
104	CISD2
105	CISD3
106	CLTRN
107	COPZ1
108	COX4I2
109	CP
110	CPEB1
111	CREB1
112	CREB3
113	CREB5
114	CS
115	CTSB
116	CYB5R1
117	CYBB
118	CYGB
119	CYP4F8
120	DAZAP1
121	DCAF7
122	DDR2
123	DECR1
124	DHODH
125	DLD
126	DNAJB6
127	DPEP1
128	DPP4
129	DUOX1
130	DUOX2
131	ECH1
132	EGFR
133	EGLN2
134	EGR1
135	ELAVL1
136	ELOVL5
137	EMC2
138	ENO3
139	ENPP2
140	EPAS1
141	EPT1
142	ETV4
143	EZH2
144	FABP4
145	FADS1
146	FADS2
147	FANCD2
148	FAR1
149	FBXW7
150	Fer1HCH
151	FGF21
152	FH
153	FLT3
154	FNDC5
155	FOXO4
156	FTH1
157	FTL
158	FTMT
159	FURIN
160	FXN
161	FZD7
162	G6PD
163	G6PDX
164	GABARAPL1
165	GABARAPL2
166	GALNT14
167	GCH1
168	GCLC
169	GDF15
170	GJA1
171	GLRX5
172	GLS2
173	GOT1
174	GPAT4
175	GPX4
176	GRIA3
177	GSK3B
178	GSTM1
179	GSTZ1
180	H19
181	HCAR1
182	HDDC3
183	HELLS
184	HIF1A
185	HILPDA
186	HMGB1
187	HMOX1
188	HOTAIR
189	HRAS
190	hsa_circ_0008367
191	HSF1
192	HSPA5
193	HSPB1
194	IDH1
195	IDH2
196	IDO1
197	IFNA1
198	IFNA10
199	IFNA13
200	IFNA14
201	IFNA16
202	IFNA17
203	IFNA2
204	IFNA21
205	IFNA4
206	IFNA5
207	IFNA6
208	IFNA7
209	IFNA8
210	IFNG
211	IL1B
212	IL6
213	INTS2
214	IREB2
215	ISCU
216	JUN
217	KDM3B
218	KDM4A
219	KDM5A
220	KDM5C
221	KDM6B
222	KEAP1
223	KIF20A
224	KLF2
225	KLHDC3
226	KMT2D
227	KRAS
228	LAMP2
229	LCE2C
230	LCN2
231	LGMN
232	LIFR
233	LIG3
234	LINC00336
235	LINC00472
236	LINC00618
237	LINC01833
238	lncRNA AABR07017145.1
239	LONP1
240	LPCAT3
241	LPIN1
242	LYRM1
243	MAP1LC3A
244	MAP3K11
245	MAP3K14
246	MAPK1
247	MAPK14
248	MAPK3
249	MAPK8
250	MAPK9
251	MAPKAP1
252	MARCHF5
253	MDM2
254	MDM4
255	MEF2C
256	MEG3
257	MEG8
258	METTL14
259	MFN2
260	MGST1
261	MIB1
262	MIB2
263	MICU1
264	MIOX
265	MIR130B
266	MIR135B
267	MIR137
268	MIR15A
269	MIR17
270	miR-182-5p
271	MIR18A
272	MIR190A
273	MIR212
274	MIR214
275	MIR27A
276	MIR302A
277	MIR324
278	MIR335
279	MIR375
280	miR-378a-3p
281	MIR424
282	MIR4443
283	MIR5096
284	MIR522
285	MIR539
286	MIR545
287	MIR670
288	MIR6852
289	miR-7-5p
290	MIR761
291	MIR9-1
292	MIR9-2
293	MIR9-3
294	MIR9-3HG
295	MLLT1
296	MLST8
297	MMD
298	mmu_circRNA_0000309
299	MPC1
300	MS4A15
301	MT1DP
302	MT1G
303	MTCH1
304	MTDH
305	MTF1
306	MTOR
307	MUC1
308	MYB
309	MYCN
310	NCOA3
311	NCOA4
312	NDRG1
313	NEAT1
314	NEDD4
315	NEDD4L
316	NF2
317	NFE2L2
318	NFS1
319	NOS2
320	NOX1
321	NOX3
322	NOX4
323	NOX5
324	NQO1
325	NR1D1
326	NR1D2
327	NR4A1
328	NR5A2
329	NRAS
330	NT5DC2
331	NUPR1
332	OIP5-AS1
333	OSBPL9
334	OTUB1
335	P4HB
336	PANX1
337	PANX2
338	PAQR3
339	PARK7
340	PARP1
341	PARP10
342	PARP11
343	PARP12
344	PARP14
345	PARP15
346	PARP16
347	PARP2
348	PARP3
349	PARP4
350	PARP6
351	PARP8
352	PARP9
353	PDK4
354	PDSS2
355	PEBP1
356	PEDS1
357	PEX10
358	PEX12
359	PEX2
360	PEX3
361	PEX6
362	PGD
363	PGRMC1
364	PHF21A
365	PHKG2
366	PIEZO1
367	PIK3CA
368	PIR
369	PLA2G6
370	PLIN2
371	PML
372	POM121L12
373	POR
374	PPARA
375	PPARD
376	PPARG
377	PPP1R13L
378	PRDX1
379	PRDX6
380	PRKAA1
381	PRKAA2
382	PRKCA
383	PROK2
384	PROM2
385	PRR5
386	PTEN
387	PTGS2
388	PTPN18
389	PTPN6
390	PVT1
391	QSOX1
392	RARRES2
393	RB1
394	RBMS1
395	RELA
396	RHEBP1
397	RICTOR
398	RNF113A
399	RPL8
400	RPTOR
401	RRM2
402	SAT1
403	SCD
404	SCP2
405	SENP1
406	SESN2
407	SIAH2
408	SIRT1
409	SIRT2
410	SIRT3
411	SIRT6
412	SLC11A2
413	SLC16A1
414	SLC1A5
415	SLC25A28
416	SLC38A1
417	SLC39A14
418	SLC39A7
419	SLC3A2
420	SLC40A1
421	SLC7A11
422	SMAD7
423	SMG9
424	SMPD1
425	SNCA
426	SNX4
427	SNX5
428	SOCS1
429	SOX2
430	SQSTM1
431	SRC
432	SREBF1
433	SREBF2
434	SRSF9
435	STAT3
436	STING1
437	STK11
438	SUV39H1
439	TAFAZZIN
440	TBK1
441	TERT
442	TF
443	TFAM
444	TFAP2A
445	TFR2
446	TFRC
447	TGFB1
448	TGFBR1
449	TIMM9
450	TIMP1
451	TLR4
452	TMBIM4
453	TMEM161B-DT
454	TMSB4X
455	TMSB4Y
456	TNFAIP3
457	TOR2A
458	TP53
459	TP63
460	TRIB2
461	TRIM21
462	TRIM26
463	TRIM46
464	TSC1
465	TTPA
466	TXN
467	TYRO3
468	ULK1
469	ULK2
470	USP11
471	USP35
472	USP7
473	VCP
474	VDAC2
475	VDR
476	WIPI1
477	WIPI2
478	WWTR1
479	YAP1
480	YTHDC2
481	YY1AP1
482	ZEB1
483	ZFAS1
484	ZFP36
